# Supplementary material
Source: Elsevier journal article supplement (https://www.sciencedirect.com/science/article/pii/S0213911119302328)
Supplement: mmc1 [file S0213911119302328:mmc1.docx]

**Apéndice A**

**Carta enviada a los pacientes**

Estimado/a *(nombre de pila)*

Le escribo por lo siguiente. Uno de los medicamentos que usted toma es *(nombre comercial del fármaco)*. Este medicamento pertenece al grupo de las benzodiazepinas y medicamentos relacionados, y queremos compartir con usted cierta información acerca de este tipo de fármacos:

- Las benzodiazepinas (tranquilizantes, ansiolíticos, pastillas para dormir) son un grupo de fármacos que sirven para el tratamiento sintomático a corto plazo de la ansiedad y del insomnio. No tienen un efecto curativo.

- Si se toman durante un tiempo de más de 2-3 semanas el cuerpo se empieza a acostumbrar al fármaco y son necesarias dosis mayores para conseguir el mismo efecto. A estas circunstancias se las denomina dependencia y tolerancia.

- Además, esto supone que si se deja de tomar el fármaco de un día para otro pueden aparecer síntomas debidos a su retirada (síntomas de abstinencia).

- Finalmente, conviene recordar que el consumo continuado de este tipo de fármaco produce efectos secundarios tales como: caídas que pueden ocasionar fracturas de cadera, accidentes de tráfico, pérdida de memoria y quizá también deterioro cognitivo.

- Existen otros abordajes no farmacológicos que pueden ayudarle en el tratamiento del insomnio y la ansiedad (medidas de higiene del sueño, técnicas de relajación, yoga…)

Por todo ello, si su situación lo permite, le recomendamos que vaya reduciendo de forma gradual la dosis de la medicación. Esta reducción la haremos de forma lenta y escalonada, para evitar efectos adversos relacionados. En su caso, esta reducción se podría realizar siguiendo el ejemplo de pauta que le enviamos en el folleto adjunto, elaborado por profesionales de Osakidetza y el Departamento de Salud del Gobierno Vasco. Lea atentamente las instrucciones en el reverso de la pauta de descenso.

Tenga en cuenta que estamos aquí para ayudarle, así que puede iniciar la reducción de dosis por su cuenta o si lo prefiere, concertar una cita para acordar juntos la pauta de reducción de dosis. También le recomendamos concertar una cita si tiene cualquier duda o dificultad.

Por último, queremos informarle de que se va a llevar a cabo un estudio para conocer si el envío de estos consejos a través de esta carta es efectivo para conseguir disminuir el uso de hipnóticos. Por ello, sus datos podrán ser utilizados por los investigadores del estudio de forma anónima y respetando la confidencialidad de los mismos en todo momento. No obstante, usted puede negarse a que se utilicen sus datos en cualquier momento, sin que de ello derive ningún perjuicio ni se vea afectada su atención médica. Para ello, basta con llamar por teléfono al siguiente número: 94 4007318 (en horario de 8.30-14.30). Comentarle también que el estudio está aprobado por el Comité de Ética e Investigación Clínica del Hospital Universitario de Basurto.

Por supuesto, estoy a su disposición para responder a todas sus preguntas.

Un cordial saludo

*Nombre del médico familia y firma escaneada*

**Apéndice B**

**Hoja de información ciudadana sobre medicamentos: *Dejar las pastillas para dormir: sin prisa pero con pauta***


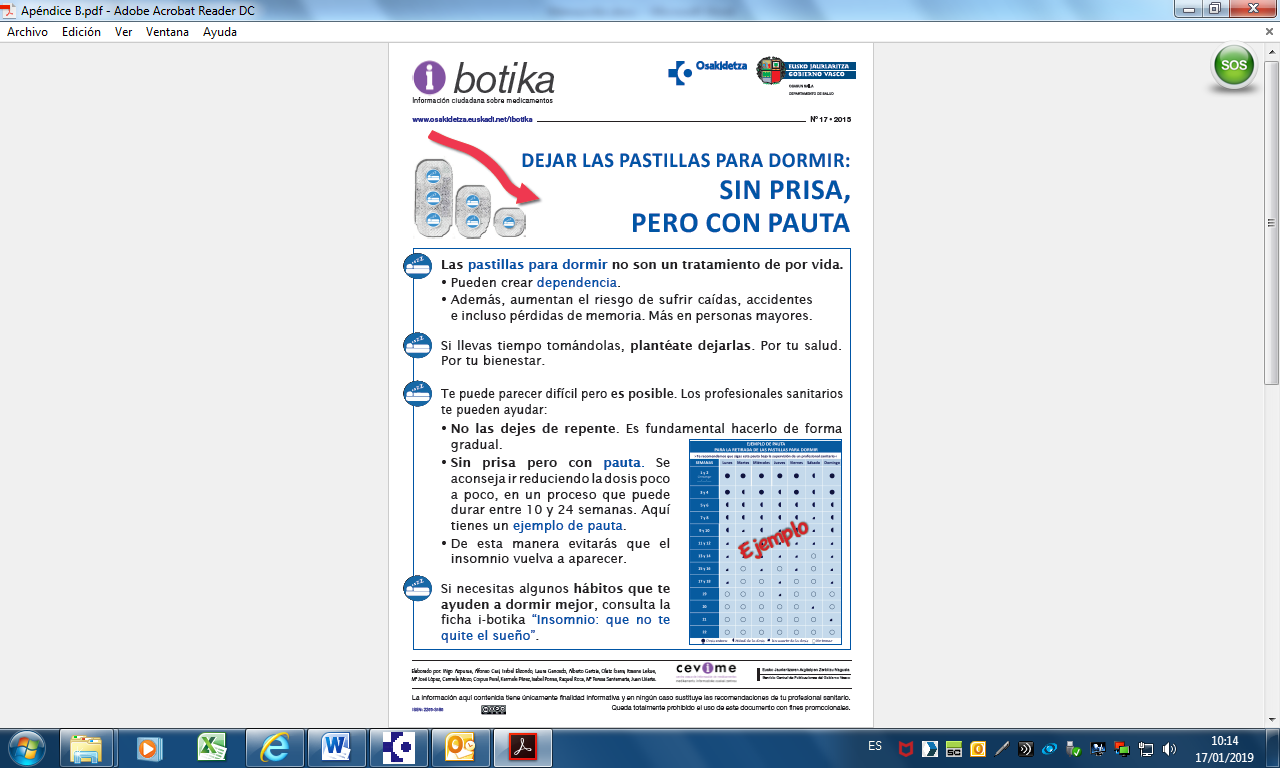


Disponible en:

- https://www.osakidetza.euskadi.eus/r85-ckpaib03/es/contenidos/informacion/cevime_ibotika_fichas/es_cevime/pastillas_dormir.html
- https://www.osakidetza.euskadi.eus/contenidos/boletin_revista/ibotika_fichas/es_def/adjuntos/ibotika_18_pastillas_dormir.pdf

**Apéndice B.1**

**Hoja de información ciudadana sobre medicamentos: Ejemplo de pauta para la retirada de las pastillas para dormir**


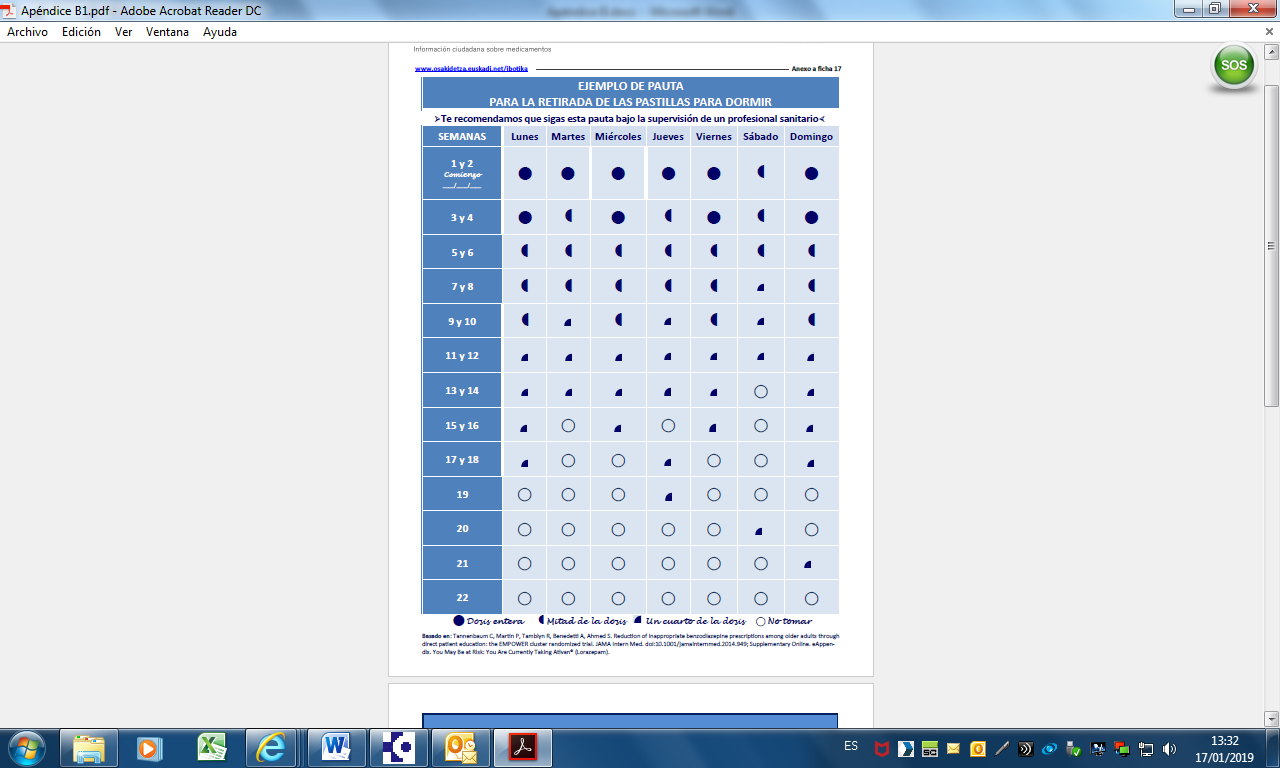


Disponible en:

- https://www.osakidetza.euskadi.eus/r85-ckpaib03/es/contenidos/informacion/cevime_ibotika_fichas/es_cevime/pastillas_dormir.html
- https://www.osakidetza.euskadi.eus/contenidos/boletin_revista/ibotika_fichas/es_def/adjuntos/ibotika_18_anexo_es.pdf

**Apéndice B.2**

**Hoja de información ciudadana sobre medicamentos: Lo egiteko pilulak uzteko jarraibide-eredua**


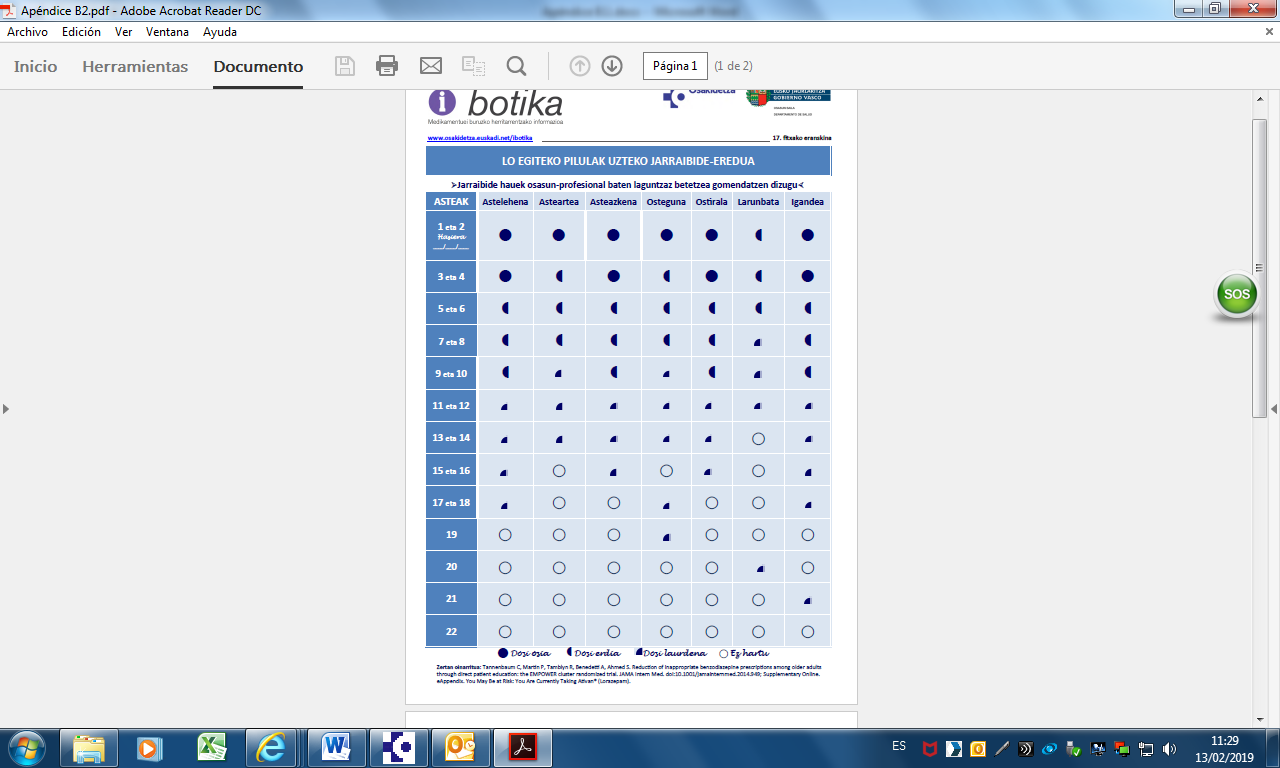


Disponible en:

- http://www.euskadi.eus/web01-a2botika/eu/contenidos/informacion/cevime_ibotika_fichas/eu_miez/lo_pilulak.html
- https://www.osakidetza.euskadi.eus/contenidos/boletin_revista/ibotika_fichas/eu_def/adjuntos/ibotika_18_anexo_eu.pdf

**Apéndice C**

**Hoja de información ciudadana sobre medicamentos: *Insomnio: que no te quite el sueño***


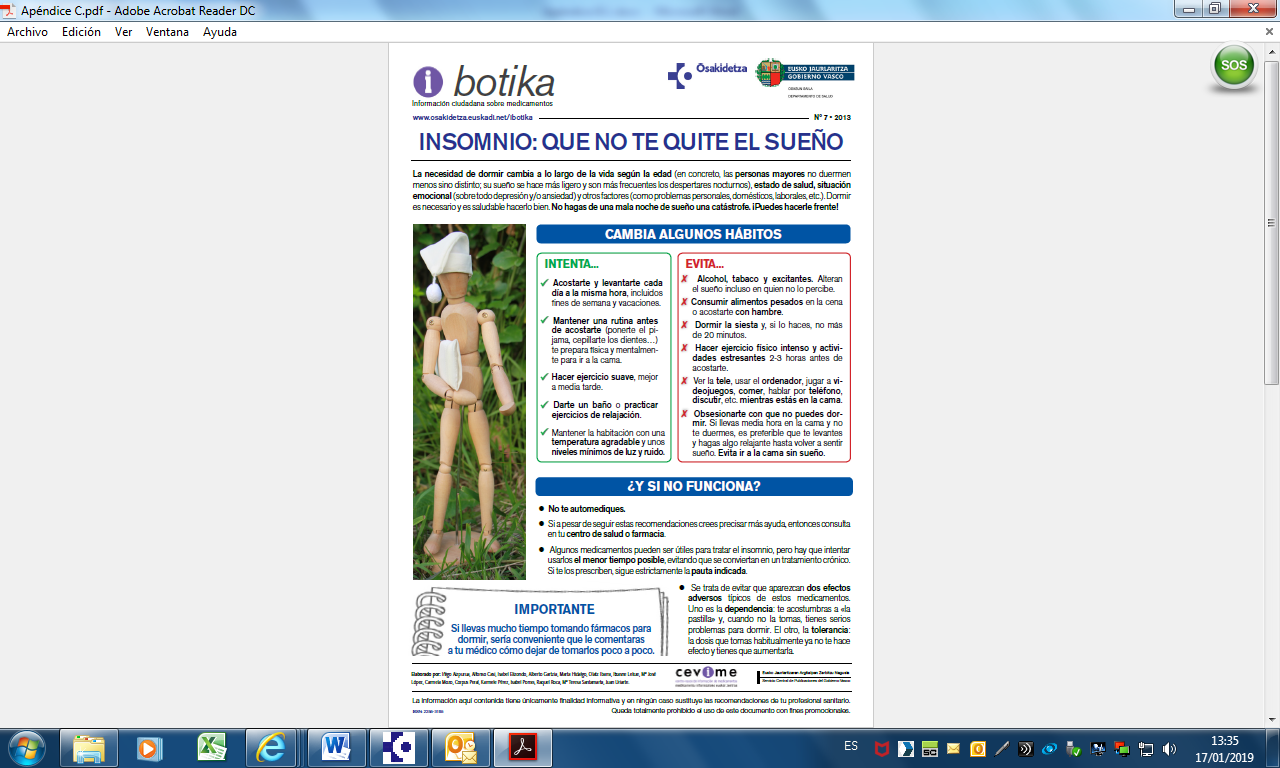


Disponible en:

- https://www.osakidetza.euskadi.eus/r85-ckpaib03/es/contenidos/informacion/cevime_ibotika_fichas/es_cevime/insomnio.html
- https://www.osakidetza.euskadi.eus/contenidos/boletin_revista/ibotika_fichas/es_def/adjuntos/7_PACIENT_2.pdf

**Apéndice D**

**Tabla de equivalencias de diazepam utilizadas**

| **Principio activo** | **Dosis (mg) equivalente a 5 mg de diazepam** |
| --- | --- |
| Diazepam | 5 |
| Alprazolam | 0,5 |
| Bentazepam | 25 |
| Bromazepam | 6 |
| Clorazepato dipotásico | 7,5 |
| Loprazolam | 1 |
| Lorazepam | 1 |
| Lormetazepam | 1 |
| Triazolam | 0,25 |
| Zolpidem | 10 |
| Zopiclona | 7,5 |

**Apéndice E**

**Cuestionario *online* para medir la aceptación de la intervención por los/las médicos/as de familia**

| **ENCUESTA A PROFESIONALES PARTICIPANTES EN PROYECTO *BENZOCARTA*** |
| --- |

Estimada/o compañera/o:

En primer lugar, queríamos agradecerte nuevamente tu participación en el proyecto de Benzocarta. Como protagonista de este proyecto que eres, nos interesa mucho conocer tu opinión, por lo que agradeceríamos que respondieras a este formulario que no te llevará más de 5 minutos. Se trata de una encuesta anónima.

Una vez más, gracias por todo.

Principio del formulario

* 1. ¿Qué impresiones has recibido por parte de las/os pacientes que han recibido la Benzocarta?

La aceptación por parte de las/os pacientes ha sido buena

La aceptación ha sido irregular, algunas/os no les ha gustado recibir la carta en casa, se han sentido molestos.

Creo que la iniciativa no ha contado con una buena aceptación por parte de las/os pacientes.

* 2. ¿Cuál es tu impresión respecto a la actitud para el descenso o abandono de aquellas/os pacientes que han recibido la Benzocarta?

La mayoría intentarán bajar o dejar de tomar la pastilla para dormir.

Algunas/os dejarán o intentarán de tomar la pastilla.

Muy pocas/os lo intentarán.

Ninguna/o lo intentará o dejará.

* 3. ¿Cuáles consideras que son los puntos fuertes de esta iniciativa? (puedes seleccionar más de una)

Sencilla.

Breve (consume poco tiempo)

Buena aceptación por parte de las/os pacientes

Eficacia de la intervención

Otro (especifique)

* 4. ¿Qué es lo que menos te gusta, qué es lo que le falta o qué cambiarías? (puedes seleccionar más de una)

Consume mucho tiempo

Revisión de los listados.

Ha motivado un aumento de las visitas a la consulta

Me parece que es poco efectiva

Otro (especifique)

*** 5. Cualquier otra cuestión, sugerencia, crítica o comentario que quieras compartir**

Final del formulario

**Apéndice F**

**Médicas/os de familia voluntarias/os que participaron en la intervención (2016)**

| | Itziar Villa Canibe | UAP Basurto | | --- | --- | | Mikel Baza Bueno | UAP Begoña | | Mª Ángeles Fernández de Luco | UAP Begoña | | Ana Rosario Angulo Rivero | UAP Begoña | | Fco. Javier Uria Ibargüengoitia | UAP Begoña | | Nagore Arce Arana | UAP Bolueta | | Alberto López González | UAP Bolueta | | María Ángeles López Kareaga | UAP Bolueta | | Esperanza Díez Rodríguez | UAP Bolueta | | Iñigo Alquiza Basáñez | UAP Bolueta | | Mª del Carmen Hierro Sánchez | UAP Bombero Etxaniz | | Juan Carlos Fuente Ibañez | UAP Bombero Etxaniz | | Karmele Pérez Erregerena | UAP Bombero Etxaniz | | Nerea Larrinaga Piedra | UAP Deusto | | Agustín Salazar García | UAP Deusto | | Ana Aranguren Mendieta | UAP Deusto | | Mª Jesús Sáenz Larrinaga | UAP La Peña | | Yolanda González Azcárate | UAP La Peña | | Alazne Ramoneda Errazkin | UAP La Peña | | Pilar Méndez San José | UAP La Peña | | Ana Basarte Anguiano | UAP La Peña | | Oscar de Miguel Pablos | UAP La Peña | | Gotzone Pérez Urraza | UAP Otxarkoaga | | Mª Teresa Ugartetxe González de Langarica | UAP Otxarkoaga | | Aintzane Andikoetxea Agorria | UAP Otxarkoaga | | Ana María Rubio Gutierrez | UAP Rekalde | | Miren Aizpuru Barandiaran | UAP Rekalde | | Ana María Zumalde Otegui | UAP Rekalde | | Estibaliz Alonso Saratxaga | UAP San Ignacio | | María Recio Barbier | UAP San Ignacio | | Lorea Rivacoba Orbe | UAP San Ignacio | | Iñaki Martín Lesende | UAP San Ignacio | | Esther Etxegarai Maidagan | UAP Txurdinaga | | Naiara Centeno Ortiz de Zárate | UAP Txurdinaga | | Laura Martínez Velasco | UAP Zurbarán | | Raquel Benavides Alonso | UAP Zurbarán | | Verónica Bengoa Tomé | UAP Zurbarán | | Itziar Aldecoa García | UAP San Adrián | | Jesús Fernández de Mendiola Espino | UAP San Adrián | | Asier Fernández Durana | UAP San Adrián | | Carlos Blanco Mata | UAP Mina del Morro | | Emilia Pereda Carro | UAP Gazteleku | | Loreto Palacios Elua | UAP Gazteleku | | Mª Violeta González Urcelay | UAP Gazteleku | | Itziar Hernando Mendibil | UAP El Karmelo | | Leire Ampudia Gamero | UAP El Karmelo | | Josu Zunzunegui Marcaida | UAP El Karmelo | | Carmen González Temprano | UAP El Karmelo | | Amaia Martínez Urquiri | UAP El Karmelo | | Roberto Hernández Rodríguez | UAP El Karmelo | | Mª Ángeles Moracho Sengariz | UAP El Karmelo | |  |
| --- | --- | --- | --- | --- | --- | --- | --- | --- | --- | --- | --- | --- | --- | --- | --- | --- | --- | --- | --- | --- | --- | --- | --- | --- | --- | --- | --- | --- | --- | --- | --- | --- | --- | --- | --- | --- | --- | --- | --- | --- | --- | --- | --- | --- | --- | --- | --- | --- | --- | --- | --- | --- | --- | --- | --- | --- | --- | --- | --- | --- | --- | --- | --- | --- | --- | --- | --- | --- | --- | --- | --- | --- | --- | --- | --- | --- | --- | --- | --- | --- | --- | --- | --- | --- | --- | --- | --- | --- | --- | --- | --- | --- | --- | --- | --- | --- | --- | --- | --- | --- | --- | --- | --- |

UAP: Unidad de Atención Primaria.
